# Supplementary material for: Allelopathic Potential of Marsdenia tenacissima (Roxb.) Moon against Four Test Plants and the Biological Activity of Its Allelopathic Novel Compound, 8-Dehydroxy-11β-O-Acetyl-12β-O-Tigloyl-17β-Marsdenin
Source: MDPI journal article supplement (doi:10.3390/plants12081663), 2023-04-15
Supplement: s1 [file s1]

**Table S1.** *I*<sub>50</sub> value (mM) of the shoot and root growth of cress by steroidal glycosides 1, 2, and 3.

| Test plant |       | <i>I</i> <sub>50</sub> value (mM) |                       |                       |
|------------|-------|-----------------------------------|-----------------------|-----------------------|
|            |       | Steroidal glycoside 1             | Steroidal glycoside 2 | Steroidal glycoside 3 |
| Cress      | Shoot | 0.45 b                            | 0.74 a                | 0.25 c                |
|            | Root  | 0.03 e                            | 0.12 d                | 0.03 e                |

Different letters indicate significant difference according to Tukey's HSD test ( $p < 0.05$ ).
